# Supplementary material for: Calotropis procera flower extract for the synthesis of double edged octahedral α-Fe2O3 nanoparticles via a greener approach: an insight into its structure property relationship for Escherichia coli
Source: Royal Society of Chemistry journal article supplement (doi:10.1039/d3nj01044a), 2023-01-01
Supplement: d3nj01044a1.pdf [file d3nj01044a1.pdf]

### Supporting Information

## *Calotropisprocera* flower extract for the Synthesis of Double Edged Octahedral $\alpha$ -Fe<sub>2</sub>O<sub>3</sub> Nanoparticles via Greener Approach: An Insight into its Structure Property Relationship for *Escherichia coli*

Karuvellan Murugan,<sup>\*a,b</sup> Rajakannu Subashini,<sup>a</sup> Udayadasan Sathiskumar<sup>c</sup> and Greeshma Odukkathil<sup>d</sup>

- a.* Department of Biomedical Engineering, Sri Sivasubramaniya Nadar (SSN) College of Engineering.  
*b.* Department of Microbiology, Vels Institute of Science, Technology and Advanced Studies (VISTAS). E.mail: micromurugn14@gmail.com  
*c.* Science & Humanities, Department of Chemistry, Chennai Institute of Technology (CIT). E.mail: sathiskumar84chem@gmail.com  
*d.* Centre for Clean Environment, Vellore Institute of Technology.

**Table S1.** The docking analysis of non-covalent aminoacid residue interactions of **2mqe protease** and **6zhp protease** against **Fe<sub>2</sub>O<sub>3</sub> NPs** (monomer), **Fe<sub>4</sub>O<sub>6</sub> NPs** (dimer), **Fe<sub>6</sub>O<sub>9</sub> NPs** (trimer) and **Fe<sub>8</sub>O<sub>12</sub> NPs** (tetramer) respectively.

| S.No | Pub chem. Id | Lead molecule                      | Residue Interaction                                                                                                                                                                                                                                                                | Nature of bond         |                                      |                   | Distance (Å)      |      |
|------|--------------|------------------------------------|------------------------------------------------------------------------------------------------------------------------------------------------------------------------------------------------------------------------------------------------------------------------------------|------------------------|--------------------------------------|-------------------|-------------------|------|
|      |              |                                    |                                                                                                                                                                                                                                                                                    |                        | <i>H-Donor</i>                       | <i>H-Acceptor</i> |                   |      |
| 1    | 2mqe         | Fe <sub>2</sub> O <sub>3</sub> NPs | :UNK0:O - A:PHE202:O<br>A:SER198:HG - :UNK0:O<br>A:ARG256:HH21 - :UNK0:O<br>A:ARG256:HE - :UNK0:O<br>:UNK0:O - A:LYS206:O<br>A:SER198:HB3 - :UNK0:O<br>A:ARG256:HD2 - :UNK0:O                                                                                                      | H-Bonding Interactions | Classical H-Bonding Interactions     | :UNK0:O           | A:PHE202:O        | 3.30 |
|      |              |                                    |                                                                                                                                                                                                                                                                                    |                        |                                      | A:SER198:HG       | :UNK0:O           | 2.29 |
|      |              |                                    |                                                                                                                                                                                                                                                                                    |                        |                                      | A:ARG256:HH21     | :UNK0:O           | 2.53 |
|      |              |                                    |                                                                                                                                                                                                                                                                                    |                        |                                      | A:ARG256:HE       | :UNK0:O           | 2.38 |
|      |              |                                    |                                                                                                                                                                                                                                                                                    |                        |                                      | :UNK0:O           | A:LYS206:O        | 3.29 |
|      |              |                                    |                                                                                                                                                                                                                                                                                    |                        |                                      | :UNK0:O           | A:LYS206:O        | 3.29 |
|      |              |                                    |                                                                                                                                                                                                                                                                                    |                        | Non-Classical H-Bonding Interactions | <i>H-Donor</i>    | <i>H-Acceptor</i> |      |
|      |              |                                    |                                                                                                                                                                                                                                                                                    |                        |                                      | A:SER198:HB3      | :UNK0:O           | 2.74 |
|      |              | A:ARG256:HD2                       | :UNK0:O                                                                                                                                                                                                                                                                            | 2.89                   |                                      |                   |                   |      |
| 2    | 2mqe         | Fe <sub>4</sub> O <sub>6</sub> NPs | :UNK0:O - A:ASN205:O<br>:UNK0:O - A:LYS206:O<br>:UNK0:O - A:ASN203:O<br>A:ARG307:HH11 - :UNK0:O<br>A:SER198:HG - :UNK0:O<br>A:ARG256:HH21 - :UNK0:O<br>A:ARG256:HE - :UNK0:O<br>A:ARG256:HE - :UNK0:Fe<br>A:ARG256:HE - :UNK0:O<br>A:ARG256:HD2 - :UNK0:O<br>A:THR240:HA - :UNK0:O | H-Bonding Interactions | Classical H-Bonding Interactions     | <i>H-Donor</i>    | <i>H-Acceptor</i> |      |
|      |              |                                    |                                                                                                                                                                                                                                                                                    |                        |                                      | :UNK0:O           | A:ASN205:O        | 3.37 |
|      |              |                                    |                                                                                                                                                                                                                                                                                    |                        |                                      | :UNK0:O           | A:LYS206:O        | 3.30 |
|      |              |                                    |                                                                                                                                                                                                                                                                                    |                        |                                      | :UNK0:O           | A:ASN203:O        | 3.27 |
|      |              |                                    |                                                                                                                                                                                                                                                                                    |                        |                                      | A:ARG307:HH11     | :UNK0:O           | 3.05 |
|      |              |                                    |                                                                                                                                                                                                                                                                                    |                        |                                      | A:SER198:HG       | :UNK0:O           | 2.38 |
|      |              |                                    |                                                                                                                                                                                                                                                                                    |                        |                                      | A:ARG256:HH21     | :UNK0:O           | 2.62 |
|      |              |                                    |                                                                                                                                                                                                                                                                                    |                        |                                      | A:ARG256:HE       | :UNK0:O           | 2.39 |
|      |              |                                    |                                                                                                                                                                                                                                                                                    |                        |                                      | A:ARG256:HE       | :UNK0:Fe          | 2.17 |
|      |              |                                    |                                                                                                                                                                                                                                                                                    |                        |                                      | A:ARG256:HE       | :UNK0:O           | 2.60 |
|      |              |                                    |                                                                                                                                                                                                                                                                                    |                        | Non-Classical                        | <i>H-Donor</i>    | <i>H-Acceptor</i> |      |
|      |              |                                    |                                                                                                                                                                                                                                                                                    |                        |                                      | A:ARG256:HD2      | :UNK0:O           | 2.48 |
|      |              |                                    |                                                                                                                                                                                                                                                                                    |                        |                                      | A:THR240:HA       | :UNK0:O           | 2.86 |
|      |              |                                    |                                                                                                                                                                                                                                                                                    |                        |                                      | A:THR240:HA       | :UNK0:O           | 2.86 |

|          |                         |                                        |                         |                                   |                                         |                         |                   |      |
|----------|-------------------------|----------------------------------------|-------------------------|-----------------------------------|-----------------------------------------|-------------------------|-------------------|------|
|          |                         |                                        | A:SER198:HB3 - :UNK0:O  |                                   | <b>Interactions</b>                     | A:SER198:HB3            | :UNK0:O           | 2.75 |
|          |                         |                                        | A:ARG307:HD3 - :UNK0:Fe |                                   |                                         | A:ARG307:HD3            | :UNK0:Fe          | 2.37 |
|          |                         |                                        | A:ARG307:HD3 - :UNK0:O  |                                   |                                         | A:ARG307:HD3            | :UNK0:O           | 2.00 |
|          |                         |                                        | A:ARG307:NH1 - :UNK0:Fe | <b>Electrostatic Interactions</b> | <b>Attractive Charge</b>                | <i>Positive</i>         | <i>Negative</i>   |      |
|          |                         |                                        | A:ARG307:NH1 - :UNK0:Fe |                                   |                                         | A:ARG307:NH1            | :UNK0:Fe          | 4.65 |
|          |                         |                                        | A:ARG307:NH1 - :UNK0:Fe |                                   |                                         | A:ARG307:NH1            | :UNK0:Fe          | 4.65 |
|          |                         |                                        | A:ARG256:NH2 - :UNK0:Fe |                                   |                                         | A:ARG256:NH2            | :UNK0:Fe          | 4.90 |
|          |                         |                                        | A:ARG256:NH2 - :UNK0:Fe |                                   |                                         | A:ARG256:NH2            | :UNK0:Fe          | 4.08 |
| <b>3</b> | <b>2mqe</b>             | <b>Fe<sub>6</sub>O<sub>9</sub> NPs</b> | :UNK0:O - A:ASP241:OD1  | <b>H-Bonding Interactions</b>     | <b>Classical H-Bonding Interactions</b> | <i>H-Donor</i>          | <i>H-Acceptor</i> |      |
|          |                         |                                        | A:ASP241:HN - :UNK0:O   |                                   |                                         | :UNK0:O                 | A:ASP241:OD1      | 3.17 |
|          |                         |                                        | A:ARG307:HH11 - :UNK0:O |                                   |                                         | A:ASP241:HN             | :UNK0:O           | 2.37 |
|          |                         |                                        | :UNK0:O - A:ASN203:O    |                                   |                                         | A:ARG307:HH11           | :UNK0:O           | 2.83 |
|          |                         |                                        | :UNK0:O - A:ASN203:O    |                                   |                                         | :UNK0:O                 | A:ASN203:O        | 3.18 |
|          |                         |                                        | :UNK0:O - A:ASN205:O    |                                   |                                         | :UNK0:O                 | A:ASN203:O        | 3.18 |
|          |                         |                                        | :UNK0:O - A:LYS206:O    |                                   |                                         | :UNK0:O                 | A:ASN205:O        | 3.26 |
|          |                         |                                        | :UNK0:O - A:PHE202:O    |                                   |                                         | :UNK0:O                 | A:LYS206:O        | 3.12 |
|          |                         |                                        | :UNK0:O - A:LYS206:O    |                                   |                                         | :UNK0:O                 | A:PHE202:O        | 2.91 |
|          |                         |                                        | A:ARG256:HE - :UNK0:O   |                                   |                                         | :UNK0:O                 | A:LYS206:O        | 2.83 |
|          |                         |                                        | A:ARG256:HE - :UNK0:Fe  |                                   |                                         | A:ARG256:HE             | :UNK0:O           | 2.68 |
|          |                         |                                        | A:ARG256:HE - :UNK0:O   |                                   |                                         | A:ARG256:HE             | :UNK0:Fe          | 2.32 |
|          |                         |                                        | A:ARG256:HH21 - :UNK0:O |                                   |                                         | A:ARG256:HE             | :UNK0:O           | 2.24 |
|          |                         |                                        | A:SER198:HG - :UNK0:O   |                                   |                                         | A:ARG256:HH21           | :UNK0:O           | 2.86 |
|          |                         |                                        |                         |                                   |                                         | A:SER198:HG             | :UNK0:O           | 2.76 |
|          |                         |                                        |                         |                                   |                                         | <i>H-Donor</i>          | <i>H-Acceptor</i> |      |
|          |                         |                                        |                         |                                   |                                         | A:ARG307:HD3 - :UNK0:O  | :UNK0:O           | 1.65 |
|          |                         |                                        |                         |                                   |                                         | A:ARG307:HD3 - :UNK0:Fe | :UNK0:Fe          | 2.19 |
|          |                         |                                        |                         |                                   |                                         | A:THR240:HB - :UNK0:O   | :UNK0:O           | 3.08 |
|          |                         |                                        |                         |                                   |                                         | A:THR240:HA - :UNK0:O   | :UNK0:O           | 2.56 |
|          |                         |                                        |                         | A:ARG256:HD2 - :UNK0:O            | :UNK0:O                                 | 3.05                    |                   |      |
|          |                         |                                        |                         | A:ARG307:NH1 - :UNK0:Fe           | <i>Positive</i>                         | <i>Negative</i>         |                   |      |
|          |                         |                                        |                         | A:ARG307:NH1 - :UNK0:Fe           | A:ARG307:NH1                            | :UNK0:Fe                | 4.30              |      |
|          |                         |                                        |                         | A:ARG307:NH1 - :UNK0:Fe           | A:ARG307:NH1                            | :UNK0:Fe                | 5.51              |      |
|          |                         |                                        |                         | A:ARG307:NH1 - :UNK0:Fe           | A:ARG307:NH1                            | :UNK0:Fe                | 4.55              |      |
|          |                         |                                        |                         | A:ARG307:NH1 - :UNK0:Fe           | A:ARG307:NH1                            | :UNK0:Fe                | 4.99              |      |
|          |                         |                                        |                         | A:ARG256:NH2 - :UNK0:Fe           | A:ARG256:NH2                            | :UNK0:Fe                | 4.24              |      |
|          | A:ARG256:NH2 - :UNK0:Fe | A:ARG256:NH2                           | :UNK0:Fe                | 4.93                              |                                         |                         |                   |      |
|          |                         | <i>H-Donor</i>                         | <i>H-Acceptor</i>       |                                   |                                         |                         |                   |      |
|          |                         | :UNK0:O                                | A:PHE204:O              | 2.65                              |                                         |                         |                   |      |
|          |                         | :UNK0:O                                | A:ASN205:O              | 3.23                              |                                         |                         |                   |      |
|          |                         | :UNK0:O                                | A:ASN203:O              | 3.20                              |                                         |                         |                   |      |
|          |                         | A:ARG307:HH12 - :UNK0:O                | A:ARG307:HH12           | :UNK0:O                           | 3.05                                    |                         |                   |      |
|          |                         | :UNK0:O - A:ASN205:O                   | :UNK0:O                 | A:ASN205:O                        | 3.19                                    |                         |                   |      |
|          |                         | :UNK0:O - A:ASN203:O                   | :UNK0:O                 | A:ASN203:O                        | 3.37                                    |                         |                   |      |
|          |                         | :UNK0:O - A:ASP241:OD1                 | :UNK0:O                 | A:ASP241:OD1                      | 2.92                                    |                         |                   |      |

|                         |              |                                     |                          |                            |                                      |                   |                   |      |                   |      |
|-------------------------|--------------|-------------------------------------|--------------------------|----------------------------|--------------------------------------|-------------------|-------------------|------|-------------------|------|
| 4                       | 2mqe         | Fe <sub>8</sub> O <sub>12</sub> NPs | :UNK0:O - A:TYR248:OH    | Electrostatic Interactions | Non Classical H-Bonding Interactions | :UNK0:O           | A:TYR248:OH       | 2.91 |                   |      |
|                         |              |                                     | A:PHE204:HA - :UNK0:O    |                            |                                      | <i>H-Donor</i>    | <i>H-Acceptor</i> | 2.17 |                   |      |
|                         |              |                                     | A:PHE204:HA - :UNK0:Fe   |                            |                                      | A:PHE204:HA       | :UNK0:O           | 2.94 |                   |      |
|                         |              |                                     | A:ARG307:NH1 - :UNK0:Fe  |                            |                                      | <i>Positive</i>   | <i>Negative</i>   | 5.51 |                   |      |
|                         |              |                                     | A:ARG307:NH1 - :UNK0:Fe  |                            |                                      | A:ARG307:NH1      | :UNK0:Fe          | 5.20 |                   |      |
|                         |              |                                     | A:ARG307:NH1 - :UNK0:Fe  |                            |                                      | A:ARG307:NH1      | :UNK0:Fe          | 4.87 |                   |      |
|                         |              |                                     | A:ARG307:NH1 - :UNK0:Fe  |                            |                                      | A:ARG307:NH1      | :UNK0:Fe          | 3.08 |                   |      |
|                         |              |                                     | A:ARG307:NH2 - :UNK0:Fe  |                            |                                      | A:ARG307:NH2      | :UNK0:Fe          | 5.11 |                   |      |
|                         |              |                                     | A:ARG307:NH2 - :UNK0:Fe  |                            |                                      | A:ARG307:NH2      | :UNK0:Fe          | 4.99 |                   |      |
|                         |              |                                     | A:ARG307:NH2 - :UNK0:Fe  |                            |                                      | A:ARG307:NH2      | :UNK0:Fe          | 4.64 |                   |      |
| 5                       | 6zhp         | Fe <sub>2</sub> O <sub>3</sub> NPs  | :UNK0:O - B:TYR124:O     | H-Bonding Interactions     | Classical H-Bonding Interactions     | <i>H-Donor</i>    | <i>H-Acceptor</i> | 2.93 |                   |      |
|                         |              |                                     | B:GLN178:HE21 - :UNK0:O  |                            |                                      | :UNK0:O           | B:TYR124:O        |      |                   |      |
|                         |              |                                     | B:THR160:HG1 - :UNK0:O   |                            |                                      | B:GLN178:HE21     | :UNK0:O           |      | 2.67              |      |
|                         |              |                                     | B:THR160:HG1 - :UNK0:Fe  |                            |                                      | B:THR160:HG1      | :UNK0:O           |      | 1.81              |      |
|                         |              |                                     | B:ARG162:HH22 - :UNK0:O  |                            |                                      | B:THR160:HG1      | :UNK0:Fe          |      | 2.19              |      |
|                         |              |                                     | B:ARG162:HE - :UNK0:Fe   |                            |                                      | B:ARG162:HH22     | :UNK0:O           |      | 3.02              |      |
|                         |              |                                     | B:ARG162:HE - :UNK0:O    |                            |                                      | B:ARG162:HE       | :UNK0:Fe          |      | 2.60              |      |
|                         |              |                                     | B:ASN123:HD21 - :UNK0:Fe |                            |                                      | B:ARG162:HE       | :UNK0:O           |      | 1.87              |      |
|                         |              |                                     | B:ASN123:HD22 - :UNK0:O  |                            |                                      | B:ASN123:HD21     | :UNK0:Fe          |      | 2.50              |      |
|                         |              |                                     | :UNK0:O - B:ASP119:OD1   |                            |                                      | B:ASN123:HD22     | :UNK0:O           |      | 2.84              |      |
|                         |              |                                     |                          |                            |                                      | :UNK0:O           | B:ASP119:OD1      |      | 3.13              |      |
|                         |              |                                     | B:ARG162:NH2 - :UNK0:Fe  |                            |                                      | Attractive Charge | <i>Positive</i>   |      | <i>Negative</i>   | 4.52 |
|                         |              |                                     |                          |                            |                                      |                   | B:ARG162:NH2      |      | :UNK0:Fe          |      |
| 6                       | 6zhp         | Fe <sub>4</sub> O <sub>6</sub> NPs  | :UNK0:O - B:TYR62:OH     | H-Bonding Interactions     | Classical H-Bonding Interactions     | <i>H-Donor</i>    | <i>H-Acceptor</i> | 3.12 |                   |      |
|                         |              |                                     | B:TYR62:HH - :UNK0:O     |                            |                                      | :UNK0:O           | B:TYR62:OH        |      |                   |      |
|                         |              |                                     | B:ARG64:HH22 - :UNK0:O   |                            |                                      | B:TYR62:HH        | :UNK0:O           |      | 2.06              |      |
|                         |              |                                     | B:ARG64:HH22 - :UNK0:O   |                            |                                      | B:ARG64:HH22      | :UNK0:O           |      | 2.11              |      |
|                         |              |                                     | B:LYS38:HZ1 - :UNK0:O    |                            |                                      | B:ARG64:HH22      | :UNK0:O           |      | 2.68              |      |
|                         |              |                                     | B:ARG64:HH12 - :UNK0:O   |                            |                                      | B:LYS38:HZ1       | :UNK0:O           |      | 1.93              |      |
|                         |              |                                     | B:ARG64:HH22 - :UNK0:O   |                            |                                      | B:ARG64:HH12      | :UNK0:O           |      | 2.23              |      |
|                         |              |                                     | B:ARG64:HH12 - :UNK0:O   |                            |                                      | B:ARG64:HH22      | :UNK0:O           |      | 2.14              |      |
|                         |              |                                     | B:ARG104:HH11 - :UNK0:O  |                            |                                      | B:ARG64:HH12      | :UNK0:O           |      | 2.56              |      |
|                         |              |                                     | B:ARG104:HH21 - :UNK0:O  |                            |                                      | B:ARG104:HH11     | :UNK0:O           |      | 2.43              |      |
|                         |              |                                     |                          |                            |                                      | B:ARG104:HH21     | :UNK0:O           |      | 2.51              |      |
|                         |              |                                     |                          |                            |                                      |                   | <i>H-Donor</i>    |      | <i>H-Acceptor</i> | 2.27 |
|                         |              |                                     | B:ARG64:HH22 - :UNK0:Fe  |                            |                                      | B:ARG64:HH22      | :UNK0:Fe          |      |                   |      |
|                         |              |                                     | B:ARG64:HH22 - :UNK0:Fe  |                            |                                      | B:ARG64:HH22      | :UNK0:Fe          |      | 2.75              |      |
| B:ARG64:HH12 - :UNK0:Fe | B:ARG64:HH12 | :UNK0:Fe                            | 2.23                     |                            |                                      |                   |                   |      |                   |      |
|                         |              |                                     |                          |                            |                                      |                   |                   |      |                   |      |
|                         |              |                                     | :UNK0:O - B:ASP135:OD2   |                            |                                      | <i>H-Donor</i>    | <i>H-Acceptor</i> | 3.21 |                   |      |
|                         |              |                                     | :UNK0:O - B:ASP135:OD2   |                            |                                      | :UNK0:O           | B:ASP135:OD2      | 3.35 |                   |      |
|                         |              |                                     | :UNK0:O - B:ASP135:OD2   |                            |                                      | :UNK0:O           | B:ASP135:OD2      |      |                   |      |

|   |      |                                     |                         |                          |                                  |                                      |                   |                   |
|---|------|-------------------------------------|-------------------------|--------------------------|----------------------------------|--------------------------------------|-------------------|-------------------|
| 7 | 6zhp | Fe <sub>6</sub> O <sub>9</sub> NPs  | :UNK0:O - B:ALA145:O    | H-Bonding Interactions   | Classical H-Bonding Interactions | :UNK0:O                              | B:ALA145:O        | 3.23              |
|   |      |                                     | :UNK0:O - B:ALA145:O    |                          |                                  | :UNK0:O                              | B:ALA145:O        | 3.24              |
|   |      |                                     | B:ARG154:HN - :UNK0:O   |                          |                                  | B:ARG154:HN                          | :UNK0:O           | 2.41              |
|   |      |                                     | B:SER147:HN - :UNK0:O   |                          |                                  | B:SER147:HN                          | :UNK0:O           | 2.79              |
|   |      |                                     | :UNK0:O - B:SER147:OG   |                          |                                  | :UNK0:O                              | B:SER147:OG       | 2.70              |
|   |      |                                     | B:ARG154:HH21 - :UNK0:O |                          |                                  | B:ARG154:HH21                        | :UNK0:O           | 2.92              |
|   |      |                                     | B:ARG154:HH11 - :UNK0:O |                          |                                  | B:ARG154:HH11                        | :UNK0:O           | 2.31              |
|   |      |                                     | B:ARG154:HH11 - :UNK0:O |                          |                                  | B:ARG154:HH11                        | :UNK0:O           | 2.16              |
|   |      |                                     | B:ARG154:HH11 - :UNK0:O |                          |                                  | B:ARG154:HH11                        | :UNK0:O           | 2.12              |
|   |      |                                     | B:TYR124:HH - :UNK0:O   |                          |                                  | B:TYR124:HH                          | :UNK0:O           | 2.08              |
|   |      |                                     | B:ARG154:HH21 - :UNK0:O |                          |                                  | B:ARG154:HH21                        | :UNK0:O           | 2.86              |
|   |      |                                     | B:ARG104:HH21 - :UNK0:O |                          |                                  | B:ARG104:HH21                        | :UNK0:O           | 2.36              |
|   |      |                                     | B:ARG104:HH11 - :UNK0:O |                          |                                  | B:ARG104:HH11                        | :UNK0:O           | 1.86              |
|   |      |                                     | B:GLY153:CA - :UNK0:O   |                          |                                  | Non-Classical H-Bonding Interactions | <i>H-Donor</i>    | <i>H-Acceptor</i> |
|   |      |                                     | B:GLY153:CA             | :UNK0:O                  |                                  |                                      |                   |                   |
|   |      |                                     |                         | <i>Positive</i>          | <i>Negative</i>                  |                                      |                   |                   |
|   |      |                                     |                         | B:ARG104:NH2 - :UNK0:Fe  | :UNK0:Fe                         | 4.02                                 |                   |                   |
|   |      |                                     |                         | B:ARG104:NH1 - :UNK0:Fe  | :UNK0:Fe                         | 3.86                                 |                   |                   |
|   |      |                                     |                         | B:ARG154:HH11 - :UNK0:Fe | :UNK0:Fe                         | 2.50                                 |                   |                   |
|   |      |                                     |                         | B:ARG154:HH11 - :UNK0:Fe | :UNK0:Fe                         | 2.39                                 |                   |                   |
|   |      | B:ARG154:HH11 - :UNK0:Fe            | :UNK0:Fe                | 2.60                     |                                  |                                      |                   |                   |
|   |      | B:ARG154:NH1 - :UNK0:Fe             | :UNK0:Fe                | 4.79                     |                                  |                                      |                   |                   |
|   |      | B:ARG154:HH11 - :UNK0:Fe            | :UNK0:Fe                | 2.98                     |                                  |                                      |                   |                   |
|   |      | B:ARG154:HH21 - :UNK0:Fe            | :UNK0:Fe                | 2.80                     |                                  |                                      |                   |                   |
|   |      | B:ARG154:NH2 - :UNK0:Fe             | :UNK0:Fe                | 4.35                     |                                  |                                      |                   |                   |
| 8 | 6zhp | Fe <sub>8</sub> O <sub>12</sub> NPs | :UNK0:O - B:LEU137:O    | H-Bonding Interactions   | Classical H-Bonding Interactions | <i>H-Donor</i>                       | <i>H-Acceptor</i> |                   |
|   |      |                                     | :UNK0:O - B:GLU139:O    |                          |                                  | :UNK0:O                              | B:LEU137:O        | 3.33              |
|   |      |                                     | :UNK0:O - B:PRO138:O    |                          |                                  | :UNK0:O                              | B:GLU139:O        | 3.30              |
|   |      |                                     | :UNK0:O - B:PRO138:O    |                          |                                  | :UNK0:O                              | B:PRO138:O        | 3.26              |
|   |      |                                     | :UNK0:O - B:PRO138:O    |                          |                                  | :UNK0:O                              | B:PRO138:O        | 3.36              |
|   |      |                                     | :UNK0:O - B:PRO138:O    |                          |                                  | :UNK0:O                              | B:PRO138:O        | 2.88              |
|   |      |                                     | :UNK0:O - B:GLU139:OE1  |                          |                                  | :UNK0:O                              | B:GLU139:OE1      | 3.28              |
|   |      |                                     | :UNK0:O - B:GLU139:OE1  |                          |                                  | :UNK0:O                              | B:GLU139:OE1      | 3.10              |
|   |      |                                     | :UNK0:O - B:TYR332:OH   |                          |                                  | :UNK0:O                              | B:TYR332:OH       | 3.08              |
|   |      |                                     | :UNK0:O - B:TYR62:OH    |                          |                                  | :UNK0:O                              | B:TYR62:OH        | 2.70              |
|   |      |                                     | B:LYS38:HZ3 - :UNK0:O   |                          |                                  | B:LYS38:HZ3                          | :UNK0:O           | 2.15              |
|   |      |                                     | B:TYR62:HH - :UNK0:O    |                          |                                  | B:TYR62:HH                           | :UNK0:O           | 2.23              |
|   |      |                                     | B:LYS38:HZ1 - :UNK0:O   |                          |                                  | B:LYS38:HZ1                          | :UNK0:O           | 2.65              |
|   |      |                                     | B:ARG64:HH12 - :UNK0:O  |                          |                                  | B:ARG64:HH12                         | :UNK0:O           | 2.22              |
|   |      | B:ARG64:HH22 - :UNK0:O              | B:ARG64:HH22            | :UNK0:O                  | 2.66                             |                                      |                   |                   |
|   |      | B:ARG104:NH2 - :UNK0:Fe             | <i>Positive</i>         | <i>Negative</i>          |                                  |                                      |                   |                   |
|   |      | B:ARG64:NH2 - :UNK0:Fe              | B:ARG104:NH2            | :UNK0:Fe                 | 5.52                             |                                      |                   |                   |
|   |      |                                     | B:ARG64:NH2             | :UNK0:Fe                 | 5.59                             |                                      |                   |                   |

|  |  |                         |                                   |                          |              |          |      |
|--|--|-------------------------|-----------------------------------|--------------------------|--------------|----------|------|
|  |  | B:ARG64:NH1 - :UNK0:Fe  | <b>Electrostatic Interactions</b> | <b>Attractive Charge</b> | B:ARG64:NH1  | :UNK0:Fe | 4.45 |
|  |  | B:ARG64:HH22 - :UNK0:Fe |                                   |                          | B:ARG64:HH22 | :UNK0:Fe | 2.85 |
|  |  | B:LYS38:HZ1 - :UNK0:Fe  |                                   |                          | B:LYS38:HZ1  | :UNK0:Fe | 1.80 |
|  |  | B:LYS38:NZ - :UNK0:Fe   |                                   |                          | B:LYS38:NZ   | :UNK0:Fe | 4.23 |
|  |  | B:LYS38:NZ - :UNK0:Fe   |                                   |                          | B:LYS38:NZ   | :UNK0:Fe | 5.59 |
|  |  | B:LYS38:NZ - :UNK0:Fe   |                                   |                          | B:LYS38:NZ   | :UNK0:Fe | 4.63 |
|  |  | B:LYS38:NZ - :UNK0:Fe   |                                   |                          | B:LYS38:NZ   | :UNK0:Fe | 3.78 |
|  |  | B:LYS38:HZ3 - :UNK0:Fe  |                                   |                          | B:LYS38:HZ3  | :UNK0:Fe | 2.67 |
|  |  | B:LYS38:NZ - :UNK0:Fe   |                                   |                          | B:LYS38:NZ   | :UNK0:Fe | 5.09 |

**Table S2.** Cartesian co-ordinates for the ground state geometry of  $\text{Fe}_2\text{O}_3$  NPs (monomer) at DFT B3LYP//6-31G (d,p) level

| Center Number | Atomic Number | Atomic Type | Coordinates (Angstroms) |           |          |
|---------------|---------------|-------------|-------------------------|-----------|----------|
|               |               |             | X                       | Y         | Z        |
| 1             | 26            | 0           | 1.310600                | -0.285042 | 2.923989 |
| 2             | 8             | 0           | 0.739889                | -1.781391 | 2.905221 |
| 3             | 8             | 0           | 0.382449                | 1.412865  | 2.980110 |
| 4             | 8             | 0           | 3.130696                | 0.366640  | 2.823675 |
| 5             | 26            | 0           | 2.103576                | 1.818845  | 2.784337 |

**Table S3.** Cartesian co-ordinates for the ground state geometry of  $\text{Fe}_4\text{O}_6$  NPs (dimer) at DFT B3LYP//6-31G (d,p) level

| Center Number | Atomic Number | Atomic Type | Coordinates (Angstroms) |           |           |
|---------------|---------------|-------------|-------------------------|-----------|-----------|
|               |               |             | X                       | Y         | Z         |
| 1             | 26            | 0           | -1.688336               | -0.223512 | -1.419555 |
| 2             | 8             | 0           | -1.689933               | 1.570840  | -1.115089 |
| 3             | 8             | 0           | -0.204279               | -0.978265 | -2.154620 |
| 4             | 8             | 0           | -2.796392               | -1.273462 | -0.428486 |
| 5             | 26            | 0           | 0.489425                | -0.843257 | -0.477435 |
| 6             | 26            | 0           | -0.675276               | 1.155152  | 0.337520  |
| 7             | 26            | 0           | -1.542700               | -1.074681 | 0.875792  |
| 8             | 8             | 0           | 1.087948                | 0.780313  | 0.086648  |
| 9             | 8             | 0           | -0.018510               | -2.063989 | 0.773250  |
| 10            | 8             | 0           | -1.504165               | 0.485116  | 1.812781  |

**Table S4.** Cartesian co-ordinates for the ground state geometry of **Fe<sub>6</sub>O<sub>9</sub> NPs (trimer)** at DFT B3LYP//6-31G (d,p) level

| Center Number | Atomic Number | Atomic Type | Coordinates (Angstroms) |           |           |
|---------------|---------------|-------------|-------------------------|-----------|-----------|
|               |               |             | X                       | Y         | Z         |
| 1             | 26            | 0           | -1.226114               | 0.227329  | 1.124618  |
| 2             | 26            | 0           | 0.798771                | -0.247073 | 0.009260  |
| 3             | 26            | 0           | -1.782168               | -1.627646 | -1.167552 |
| 4             | 26            | 0           | -2.425192               | -1.762455 | 1.186240  |
| 5             | 26            | 0           | 0.563521                | -2.569900 | 0.643878  |
| 6             | 26            | 0           | 0.479077                | -1.768790 | -1.976331 |
| 7             | 8             | 0           | 0.159035                | 1.370493  | 0.726370  |
| 8             | 8             | 0           | -0.714511               | -1.114325 | 0.192001  |
| 9             | 8             | 0           | -2.674213               | -0.150663 | 2.072719  |
| 10            | 8             | 0           | 1.474853                | -0.273612 | -1.676293 |
| 11            | 8             | 0           | 0.881068                | -3.271989 | -1.021963 |
| 12            | 8             | 0           | -0.998788               | -2.905053 | 1.670708  |
| 13            | 8             | 0           | -3.327527               | -2.079753 | -0.391022 |
| 14            | 8             | 0           | -1.100763               | -1.726156 | -2.831464 |
| 15            | 8             | 0           | 1.802701                | -1.269131 | 1.060408  |

**Table S5.** Cartesian co-ordinates for the ground state geometry of **Fe<sub>8</sub>O<sub>12</sub> NPs (tetramer)** at DFT B3LYP//6-31G (d,p) level

| Center Number | Atomic Number | Atomic Type | Coordinates (Angstroms) |           |           |
|---------------|---------------|-------------|-------------------------|-----------|-----------|
|               |               |             | X                       | Y         | Z         |
| 1             | 26            | 0           | -0.604592               | -1.647038 | 0.157579  |
| 2             | 26            | 0           | -2.131473               | 0.331080  | -0.945405 |
| 3             | 26            | 0           | -1.658209               | -3.666223 | -0.198481 |
| 4             | 26            | 0           | 1.356107                | -1.582025 | -1.591859 |
| 5             | 26            | 0           | 0.295263                | 0.920280  | -1.069178 |
| 6             | 26            | 0           | -3.163493               | -1.827978 | -0.403992 |
| 7             | 26            | 0           | -1.712763               | -2.091086 | -2.160351 |
| 8             | 26            | 0           | 0.986303                | -3.694794 | -0.417137 |
| 9             | 8             | 0           | -1.207387               | 2.035774  | -0.942475 |
| 10            | 8             | 0           | -0.565105               | -0.384765 | -0.964562 |
| 11            | 8             | 0           | -3.500967               | -0.128848 | 0.302598  |
| 12            | 8             | 0           | 1.944343                | 0.284149  | -1.557887 |
| 13            | 8             | 0           | 2.174733                | -3.276328 | -1.784668 |
| 14            | 8             | 0           | -0.353918               | -4.972113 | -0.021982 |
| 15            | 8             | 0           | -2.804385               | -3.491255 | -1.498669 |
| 16            | 8             | 0           | -2.951582               | -0.859146 | -2.019774 |
| 17            | 8             | 0           | -0.043528               | -1.740799 | -3.007642 |
| 18            | 8             | 0           | -1.982692               | -2.564236 | 1.102812  |
| 19            | 8             | 0           | 0.999374                | -2.028955 | 0.174334  |
| 20            | 8             | 0           | -1.610633               | -2.142570 | -0.660488 |

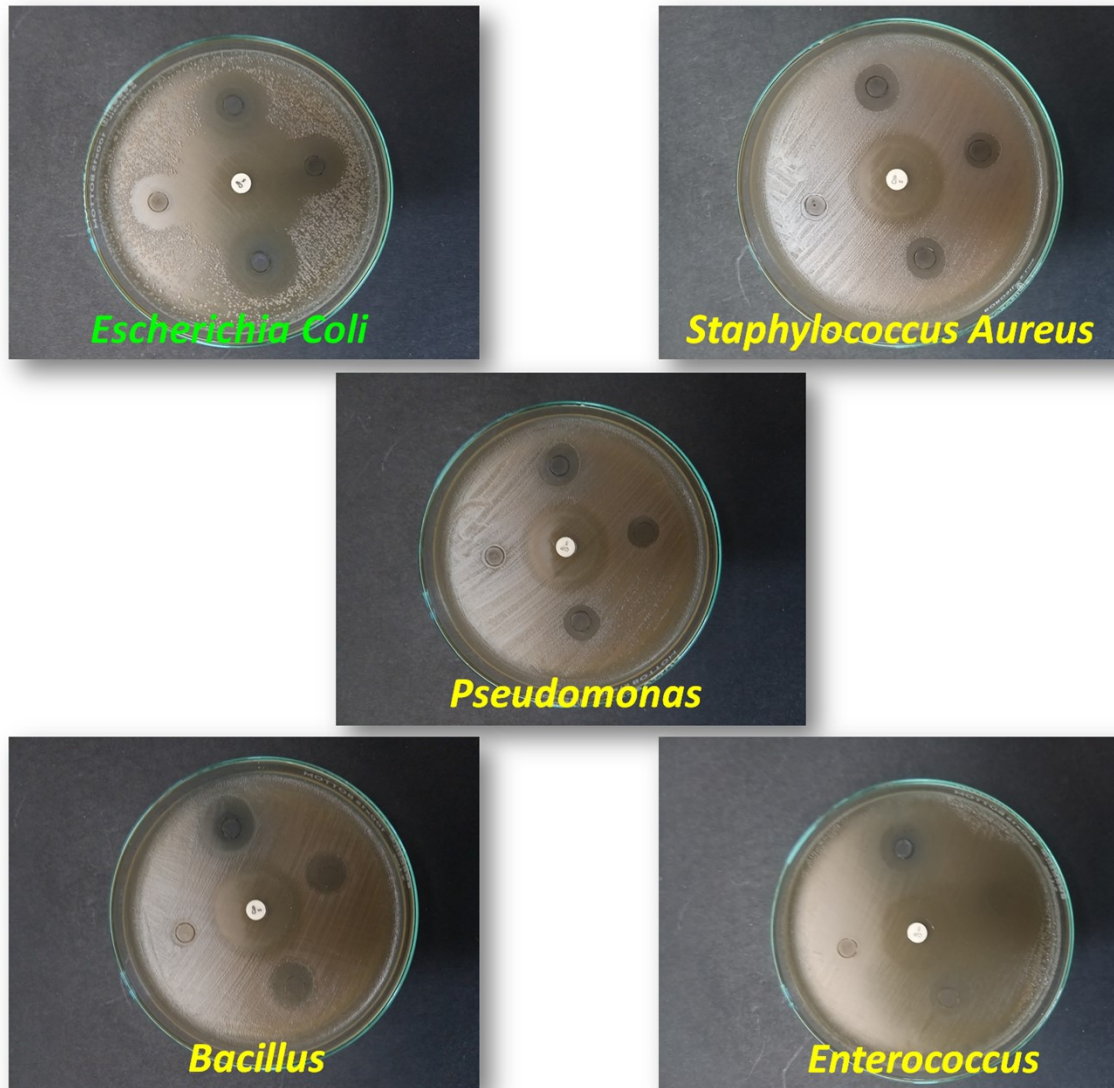

**Figure S1.** Pictorial illustration of zone of inhibition of antimicrobial activity of iron oxide nanoparticles against the bacterial strains *Staphylococcus aureus*, *Escherichia coli*, *Pseudomonas sp.*, *Bacillus sp.*, and *Enterococcus sp.*
